# Supplementary material for: A Qualitative Analysis of an Aerobic Interval Training Programme for Obese Outpatients Carried Out in a Hospital Context
Source: PubMed Central journal article supplement (PMC6981676; doi:10.3390/ijerph17010312), 2020-01-02
Supplement: ijerph-17-00312-s001.pdf [file ijerph-17-00312-s001.pdf]

# Supplementary material

Table S1. Supplementary material.

|                                   | Control Group  |                |                         | AIT Group      |                |                         | <i>p</i> (Inter-Groups) |          |
|-----------------------------------|----------------|----------------|-------------------------|----------------|----------------|-------------------------|-------------------------|----------|
|                                   | Pretest        | Posttest       | <i>p</i> (Intra-Groups) | Pretest        | Posttest       | <i>p</i> (Intra-Groups) | Pretest                 | Posttest |
| <b>Body Composition</b>           |                |                |                         |                |                |                         |                         |          |
| Body weight (kg)                  | 103.55 ± 21.98 | 103.58 ± 22.35 | 0.954                   | 94.47 ± 11.84  | 93.25 ± 10.79  | 0.078                   | 0.083                   | 0.050    |
| Waist circumference (cm)          | 116.68 ± 13.39 | 119.52 ± 17.40 | 0.223                   | 107.75 ± 8.98  | 100.06 ± 20.47 | 0.092                   | 0.009 **                | 0.001 ** |
| BMI (kg/m <sup>2</sup> )          | 38.16 ± 6.66   | 38.40 ± 6.78   | 0.227                   | 35.65 ± 3.34   | 35.32 ± 3.40   | 0.218                   | 0.108                   | 0.055    |
| Body fat (%)                      | 44.04 ± 7.58   | 43.71 ± 7.70   | 0.058                   | 42.60 ± 6.23   | 41.68 ± 6.68   | 0.014 *                 | 0.478                   | 0.334    |
| Muscle Mass (%)                   | 56.02 ± 7.58   | 56.20 ± 7.76   | 0.255                   | 56.33 ± 5.40   | 57.17 ± 5.92   | 0.441                   | 0.872                   | 0.628    |
| <b>Blood Pressure</b>             |                |                |                         |                |                |                         |                         |          |
| SBP (mmHg)                        | 146.22 ± 14.92 | 146.11 ± 17.28 | 0.965                   | 134.35 ± 15.55 | 123.29 ± 7.75  | 0.005 **                | 0.073                   | 0.000 ** |
| DBP (mmHg)                        | 80.78 ± 11.16  | 81.89 ± 8.12   | 0.575                   | 79.76 ± 8.16   | 74.06 ± 6.93   | 0.009 **                | 0.793                   | 0.016 *  |
| <b>CF</b>                         |                |                |                         |                |                |                         |                         |          |
| VO <sub>2peak</sub> (ml/kg/min)   | 14.05 ± 2.01   | 13.83 ± 2.11   | 0.411                   | 17.58 ± 4.30   | 20.07 ± 4.49   | 0.000 **                | 0.001 **                | 0.000 ** |
| FC <sub>peak</sub> (b/min)        | 137.83 ± 14.11 | 136.96 ± 12.11 | 0.700                   | 152.38 ± 23.78 | 145.04 ± 21.13 | 0.021 *                 | 0.014 *                 | 0.113    |
| Workload peak (W)                 | 95.20 ± 26.81  | 85.62 ± 26.92  | 0.002 **                | 128.12 ± 41.72 | 145.00 ± 46.20 | 0.000 **                | 0.002 **                | 0.000 ** |
| VO <sub>2</sub> at VT (ml/kg/min) | 9.98 ± 0.82    | 10.27 ± 1.61   | 0.338                   | 12.03 ± 2.97   | 13.56 ± 3.68   | 0.001 **                | 0.003 **                | 0.000 ** |
| <b>Blood variables</b>            |                |                |                         |                |                |                         |                         |          |
| Cholesterol (mg/dl)               | 171.00 ± 33.64 | 165.63 ± 25.87 | 0.064                   | 186.88 ± 27.50 | 186.50 ± 28.96 | 0.901                   | 0.080                   | 0.011 *  |
| Cholesterol HDL (mg/dl)           | 47.75 ± 11.90  | 49.75 ± 12.80  | 0.025 *                 | 51.17 ± 11.57  | 53.58 ± 10.84  | 0.070                   | 0.318                   | 0.269    |
| Triglycerides (mg/dl)             | 127.13 ± 53.36 | 123.00 ± 56.62 | 0.547                   | 108.33 ± 42.49 | 101.17 ± 43.03 | 0.113                   | 0.184                   | 0.140    |
| Glucose (mg/dl)                   | 107.17 ± 25.45 | 108.54 ± 23.71 | 0.410                   | 101.88 ± 14.94 | 103.00 ± 16.23 | 0.648                   | 0.384                   | 0.350    |
| HOMA                              | 4.62 ± 2.57    | 5.69 ± 2.94    | 0.002 **                | 3.78 ± 2.08    | 2.61 ± 1.10    | 0.001 **                | 0.215                   | 0.000 ** |

\*  $p < 0.1$ , \*\*  $p < 0.05$ .
